# Supplementary material for: New (3,4)-connected intrinsically chiral topology observed in a homochiral coordination polymer from achiral precursors
Source: Royal Society of Chemistry journal article supplement (doi:10.1039/b907092n), 2009-01-01
Supplement: b907092n.pdf [file b907092n.pdf]

Supporting Information:

**New (3, 4)-connected intrinsically chiral topology observed in a  
homochiral coordination polymer from achiral precursors**

Fei Wang, Jian Zhang, Shu-Mei Chen, Yi-Ming Xie, Xiao-Yuan Wu, Shan-Ci Chen, Rong-Min Yu  
and Can-Zhong Lu \*

*State Key Laboratory of Structural Chemistry, Fujian Institute of Research on the Structure of  
Matter, Chinese Academy of Sciences, Fuzhou, Fujian, 35002, China. E-mail: czlu@fjirsm.ac.cn*

### Topological analysis performed on TOPOS program

#### Topology for Sc1

-----

Atom Sc1 links by bridge ligands and has

| Common vertex with |         |        |        |          | R(A-A) |   |
|--------------------|---------|--------|--------|----------|--------|---|
| Cu 2               | -0.0093 | 0.6306 | 0.5375 | (-1 0 0) | 3.393A | 1 |
| Cu 1               | 0.0397  | 0.6958 | 0.1762 | (0 0 0)  | 3.493A | 1 |
| Cu 2               | -0.5093 | 0.8694 | 0.4625 | (-2 1 1) | 5.075A | 1 |
| Cu 1               | 0.9603  | 0.1958 | 0.3238 | (1-1 0)  | 5.234A | 1 |

#### Topology for Cu1

-----

Atom Cu1 links by bridge ligands and has

| Common vertex with |         |        |        |         | R(A-A) |   |
|--------------------|---------|--------|--------|---------|--------|---|
| Sc 1               | 0.2298  | 0.5638 | 0.3549 | (0 0 0) | 3.493A | 1 |
| Cu 2               | -0.4907 | 0.3694 | 0.0375 | (0 1-1) | 4.911A | 1 |
| Sc 1               | 0.7702  | 1.0638 | 0.1451 | (1 0 0) | 5.234A | 1 |

#### Topology for Cu2

-----

Atom Cu2 links by bridge ligands and has

| Common vertex with |        |        |        |         | R(A-A) |   |
|--------------------|--------|--------|--------|---------|--------|---|
| Sc 1               | 1.2298 | 0.5638 | 0.3549 | (1 0 0) | 3.393A | 1 |
| Cu 1               | 0.4603 | 0.3042 | 0.6762 | (0 1 0) | 4.911A | 1 |
| Sc 1               | 1.7298 | 0.9362 | 0.6451 | (1 1 1) | 5.075A | 1 |

-----

#### Structural group analysis

-----

-----

#### Structural group No 1

-----

Structure consists of 3D framework with Cu2Sc

#### Coordination sequences

-----

Sc1: 1 2 3 4 5 6 7 8 9 10  
Num 4 8 20 48 100 163 229 311 400 504  
Cum 5 13 33 81 181 344 573 884 1284 1788

-----

Cu1: 1 2 3 4 5 6 7 8 9 10  
Num 3 8 18 42 95 162 226 305 393 498  
Cum 4 12 30 72 167 329 555 860 1253 1751

-----

Cu2: 1 2 3 4 5 6 7 8 9 10  
Num 3 8 18 42 97 159 219 308 393 496

Cum 4 12 30 72 169 328 547 855 1248 1744

-----  
TD10=1761

Vertex symbols for selected sublattice

-----  
Sc1 Schlafli symbol: {10<sup>4</sup>;11<sup>2</sup>}  
With circuits:[10(2).10(2).10(2).11.10(2).11(5)]

-----  
Cu1 Schlafli symbol: {10<sup>3</sup>}  
With circuits:[10.10(3).10(3)]

-----  
Cu2 Schlafli symbol: {10<sup>3</sup>}  
With circuits:[10.10.10(3)]

-----  
Total Schlafli symbol: {10<sup>3</sup>}<sub>2</sub>{10<sup>4</sup>;11<sup>2</sup>}  
3,4-c net with stoichiometry (3-c)<sub>2</sub>(4-c); 3-nodal net

New topology, please, contact the authors (66853 types in 9 databases)

### Topological analysis performed on Systre program

Structure #1 - "wf1".

Structure of dimension 3.  
Given space group is P212121.  
12 nodes and 20 edges in repeat unit as given.

Given repeat unit is accurate.  
Point group has 4 elements.  
3 kinds of node.

Coordination sequences:

Node Sc3: 4 8 20 48 100 163 229 311 400 504  
Node Cu1: 3 8 18 42 95 162 226 305 393 498  
Node Cu2: 3 8 18 42 97 159 219 308 393 496

TD10 = 1761.0000

Ideal space group is P212121.

Structure is new for this run.

Relaxed cell parameters:

a = 2.02117, b = 1.02533, c = 4.67526

alpha = 90.0000, beta = 90.0000, gamma = 90.0000

Cell volume: 9.68891

Relaxed positions:

Node Sc3: 0.67121 0.42472 0.12127

Node Cu1: 0.03350 0.07186 0.08334

Node Cu2: 0.17047 0.24709 0.66904

Edges:

0.17047 0.24709 0.66904 <-> -0.17121 -0.42472 0.62127

0.03350 0.07186 0.08334 <-> -0.32879 -0.57528 0.12127

0.03350 0.07186 0.08334 <-> 0.32953 0.75291 0.16904

0.17047 0.24709 0.66904 <-> 0.17121 0.07528 0.87873

0.03350 0.07186 0.08334 <-> 0.17121 0.07528 -0.12127

Edge centers:

-0.00037 -0.08882 0.64516

-0.14765 -0.25171 0.10231

0.18151 0.41239 0.12619

0.17084 0.16118 0.77388

0.10235 0.07357 -0.01897

Edge statistics: minimum = 0.99602, maximum = 1.00395, average = 1.00000

Angle statistics: minimum = 69.97439, maximum = 176.17505, average = 118.10516

Shortest non-bonded distance = 0.79088

Degrees of freedom: 12

Finished structure #1 - "wf1".

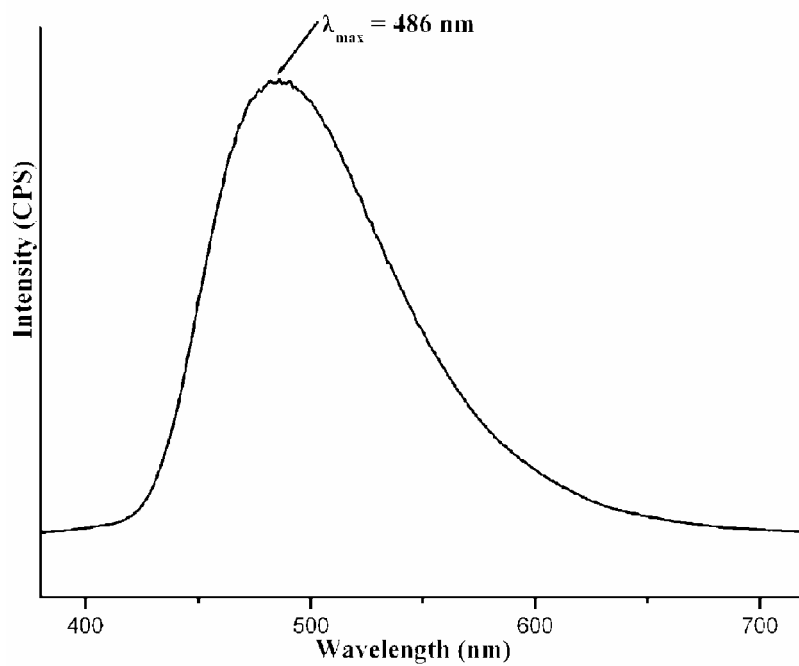

Fig. S1 Emission spectrum of compound **1** measured in the solid state at room temperature.

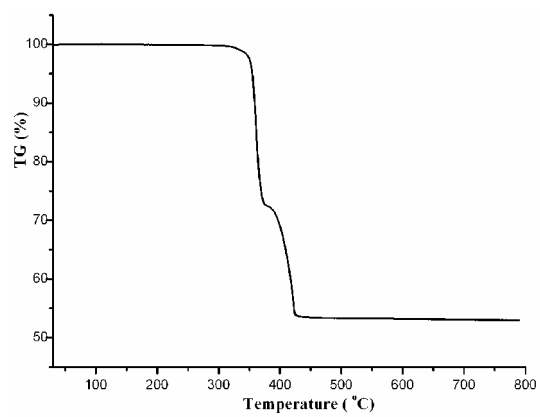

Fig. S2 Plot of TGA curves for **1** under a  $\text{N}_2$  atmosphere.
